# Supplementary material for: Cathelicidin-Related Antimicrobial Peptide Negatively Regulates Bacterial Endotoxin-Induced Glial Activation
Source: MDPI journal article supplement (doi:10.3390/cells11233886), 2022-12-01
Supplement: s1 [file s1]

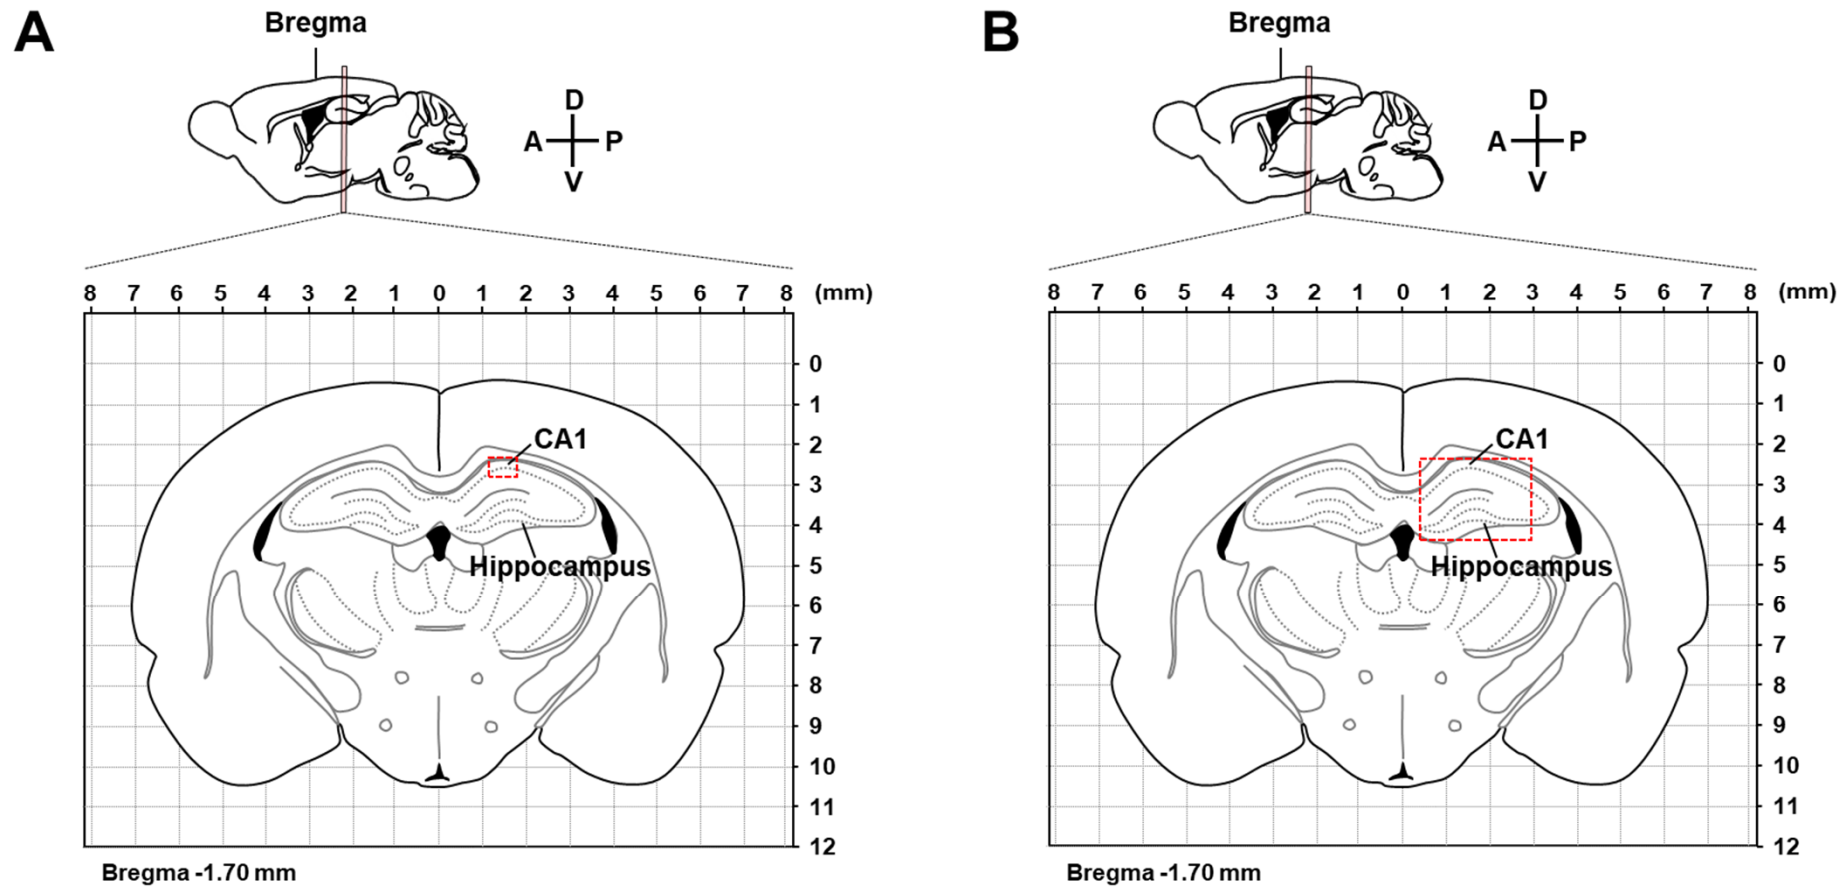

**Figure S1.** Schematic representation of brain sections used for immunostaining. (A) The coordinates of the hippocampal region of mice brain imaged under 20× objective for the study of CRAMP localization in different cell types. (B) The coordinates of the hippocampal region imaged under 5× objective to study the reactive gliosis in LPS-injected mice.

**A** Primary microglia culture

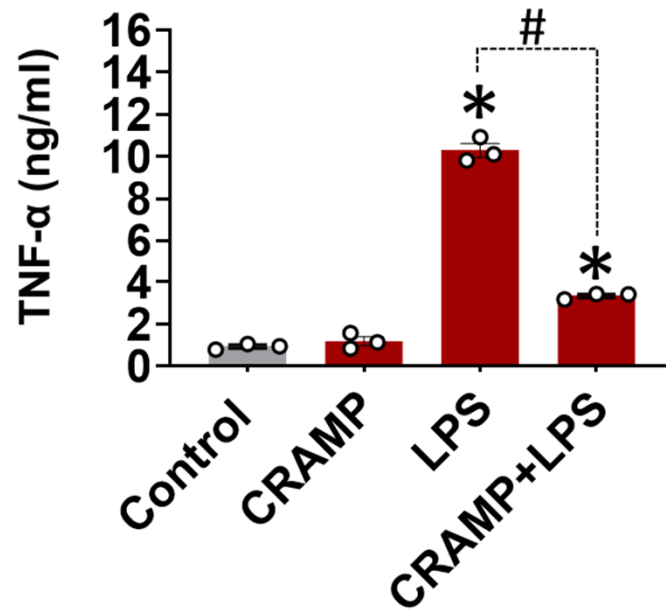

**B** Primary astrocyte culture

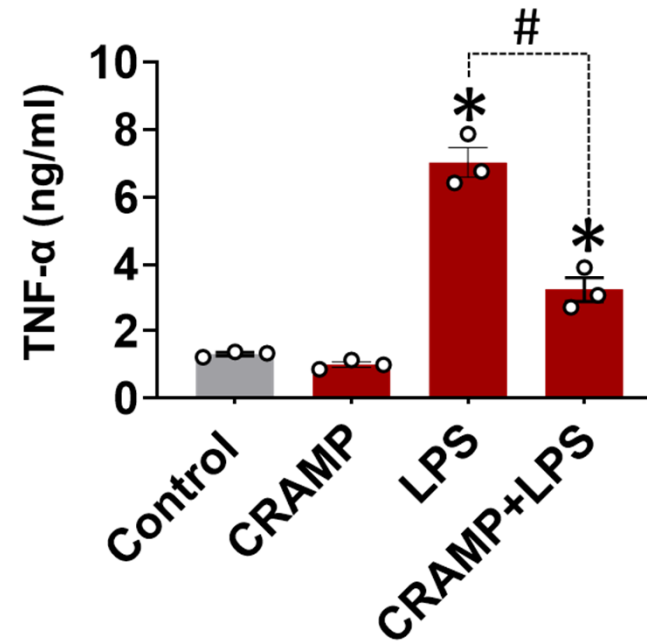

**Figure S2.** The effect of CRAMP peptide post-treatment on LPS-stimulated glial cells. The effect of CRAMP peptide (30  $\mu$ g/mL) post-treatment on LPS-induced production of TNF- $\alpha$  was determined in primary microglia (A) and astrocyte culture (B). Data are mean  $\pm$  SEM;  $n = 3$ ; \*  $p < 0.05$  versus control; #  $p < 0.05$  between the specified groups. One-way ANOVA with Tukey's post hoc test.

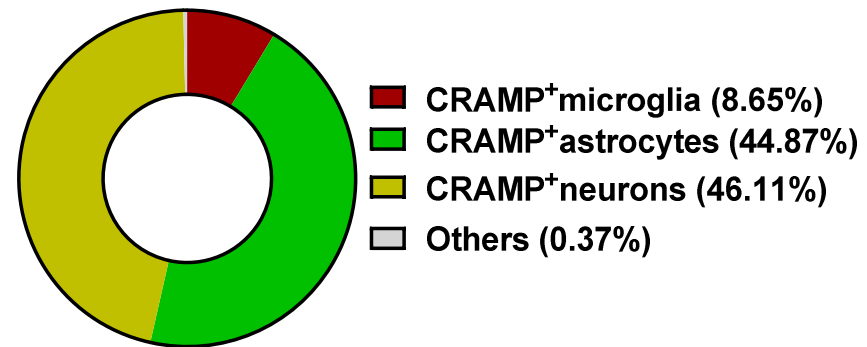

**Figure S3.** Cellular contribution of CRAMP expression in the hippocampus of LPS-injected mice.
